# Supplementary material
Source: Frontiers journal article supplement (https://www.frontiersin.org/articles/235398)

**Supplementary Figure S1.** Bar charts of hydrogen-isotopic fractionations between fatty acids and growth water, grouped by fatty acid structure and color-coded by strain. Top, middle, and bottom plots are data from cultures with no D-enrichment, medium D-enrichment, and high D-enrichment, respectively.

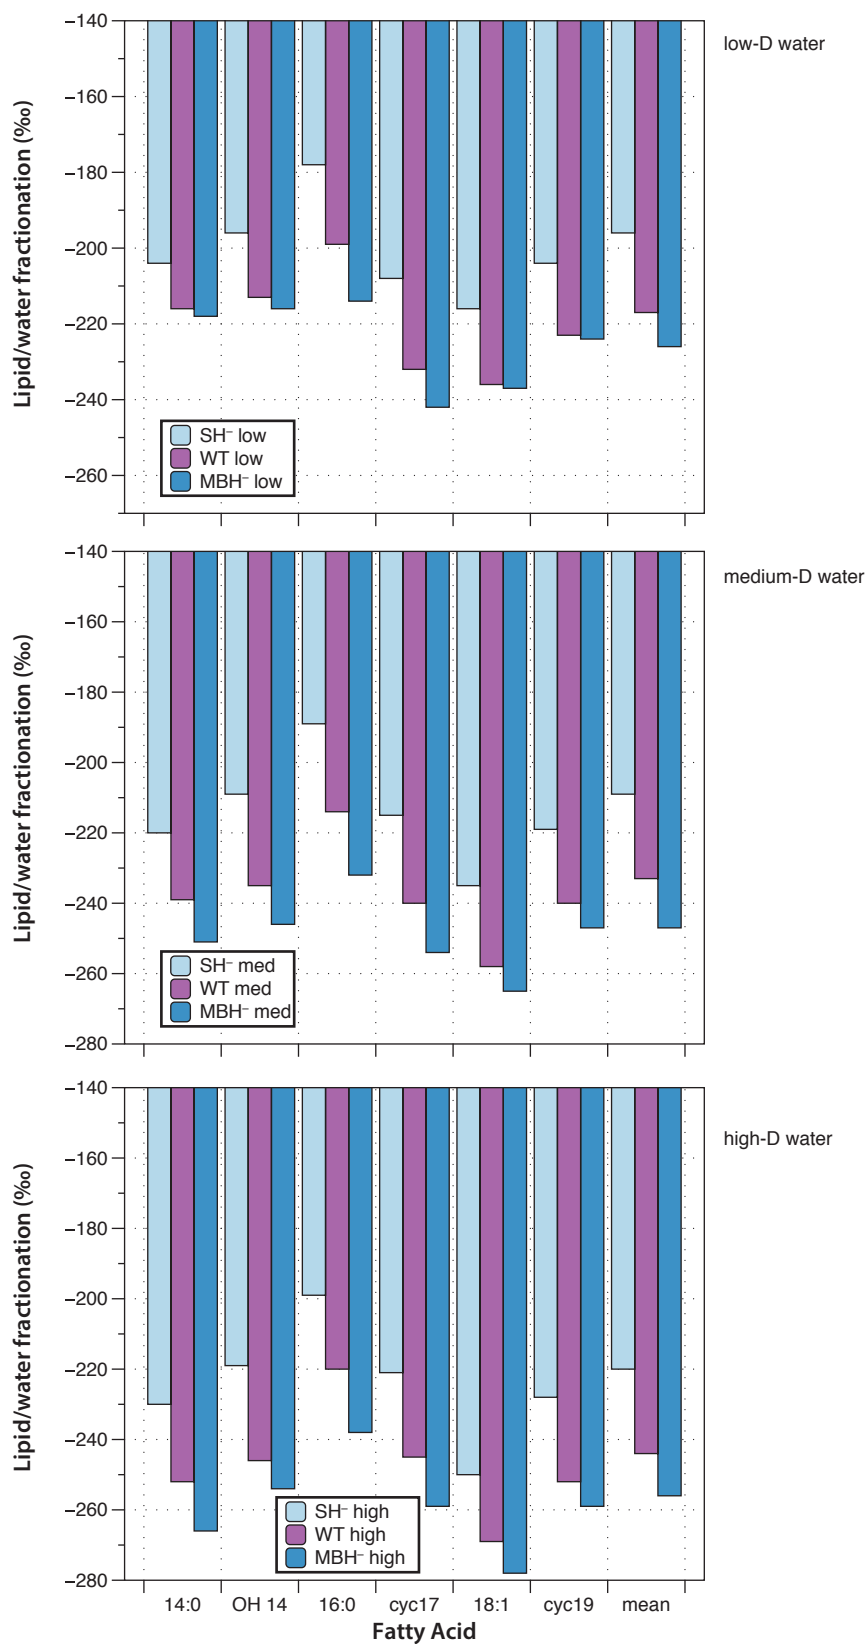

Supplement: Image_1.pdf [file Image_1.pdf]
